# Supplementary material
Source: PubMed Central journal article supplement (PMC3283882)
Supplement: 97320630008114S1.pdf [file 97320630008114S1.pdf]

## Supplementary material:

**Table 1:** Reduction in redundancy

| Total no. of ESTs | No. of ESTs forming contigs (%) | No. of contigs | No. of singletons (%) | No. of assembled sequences | Reduction in Redundancy (%) |
|-------------------|---------------------------------|----------------|-----------------------|----------------------------|-----------------------------|
| 25,495            | 22652 (88.84%)                  | 2843           | 7001 (27.46%)         | 9844                       | 61.39%                      |

**Table 2:** Gene ontology based functional annotation and classification of Contigs-SSRs of *Humulus Lupulus*.

| Gene ontology (Biological process)              | SSRESTs (numbers) | Gene ontology (Molecular function)       | SSR-ESTS (number) | GeneOntology(Cellular Component)   | SSRESTs (numbers) |
|-------------------------------------------------|-------------------|------------------------------------------|-------------------|------------------------------------|-------------------|
| Abscisic acid biosynthetic process              | 1                 | Acetate-coa ligase activity              | 1                 | Actin cytoskeleton                 | 1                 |
| Abscisic acid mediated signalling pathway       | 2                 | Acetolactate synthase activity           | 1                 | Anchored to membrane               | 1                 |
| Acetyl-coa biosynthetic process from pyruvate   | 2                 | Acid phosphatase activity                | 1                 | Apoplast                           | 18                |
| Actin filament depolymerization                 | 1                 | Acyl carrier activity                    | 2                 | ATP binding cassette transporter   | 1                 |
| Actin nucleation                                | 1                 | Acyl-coa dehydrogenase activity          | 1                 | Catalytic activity                 | 1                 |
| Actin polymerization                            | 1                 | Adenylylsulfate kinase activity          | 3                 | Cell plate                         | 1                 |
| Activation of protein kinase C activity by GPCR | 1                 | Alanine-glyoxylate transaminase activity | 1                 | Cell surface                       | 1                 |
| Aerobic respiration                             | 3                 | Alcohol dehydrogenase(nad) activity      | 1                 | Cell wall                          | 43                |
| Aging                                           | 2                 | Allene-oxide cyclase activity            | 1                 | Central vacuole                    | 2                 |
| Amino acid transport                            | 2                 | Alpha-amylase activity                   | 2                 | Chloroplast                        | 73                |
| Ammonia assimilation cycle                      | 3                 | Alpha-galactosidase activity             | 1                 | Chloroplast envelope               | 2                 |
| Anther dehiscence                               | 2                 | Amino acid transmembrane transporter     | 3                 | Chloroplast photosystem II         | 5                 |
| Anthocyanin metabolic process                   | 1                 | Amino acid binding                       | 2                 | Chloroplast thylakoid membrane     | 6                 |
| Anti-apoptosis                                  | 1                 | Ammonia-lysate activity                  | 1                 | CUL4 RING ubiquitin ligase complex | 1                 |
| Arginine process to glutamate                   | 1                 | Anchored to membrane                     | 1                 | Cytoplasm                          | 12                |
| Aromatic amino acid family biosynthetic process | 2                 | Antioxidant activity                     | 1                 | Cytoplasmic large ribosomal unit   | 6                 |
| Asparagine biosynthetic process                 | 2                 | Asparagine synthase                      | 1                 | Cytosol                            | 56                |
| ATP biosynthetic process                        | 1                 | Atp binding                              | 28                | Cytosolic large ribosomal unit     | 10                |
| ATP synthesis coupled proton transport          | 14                | Atpase activity                          | 9                 | Cytosolic small ribosomal subunit  | 8                 |
| Auxin mediated signalling                       | 3                 | Beta-amylase activity                    | 1                 | Early endosome membrane            | 1                 |
| Auxin polar transport                           | 2                 | Beta-galactosidase activity              | 1                 | Endomembrane system                | 33                |
| Base-excision repair                            | 1                 | Binding                                  | 6                 | Endoplasmic reticulum              | 10                |
| Brassinosteroid biosynthetic process            | 11                | Caffeate o-methyltransferase activity    | 2                 | Extracellular region               | 1                 |
| Calcium mediated signalling                     | 6                 | Calcium channel activity                 | 1                 | Extrinsic to membrane              | 1                 |
| Carbohydrate biosynthetic process               | 1                 | Calcium ion binding                      | 5                 | Extrinsic to vacuolar membrane     | 1                 |
| Carbohydrate metabolic process                  | 6                 | Calmodulin binding                       | 5                 | Integral to membrane               | 3                 |
| Carboxylic acid metabolic process               | 1                 | Carbohydrate tranmembrane transporter    | 1                 | Intracellular                      | 2                 |
| Carotenoid biosynthetic process                 | 3                 | Carbon sulfur lyase activity             | 2                 | Intrinsic to endoplasmic reticulum | 1                 |
| Cell death                                      | 1                 | Carboxypeptidase activity                | 1                 | Membrane                           | 8                 |
| Cell proliferation                              | 1                 | Catalytic activity                       | 6                 | Mitochondrial respiratory complex  | 7                 |
| Cell redox homeostasis                          | 7                 | Cellulose synthase activity              | 2                 | Mitochondrion                      | 8                 |
| Cell wall loosening                             | 1                 | Chalcone isomerase activity              | 2                 | Nuclear envelope                   | 1                 |
| Cell wall modification                          | 3                 | Chaperone binding                        | 1                 | Nuclear speck                      | 2                 |
| Cell wall organization                          | 2                 | Chitin binding                           | 1                 | Nucleic acid binding               | 1                 |
| Cell wall thickening                            | 1                 | Chitinase activity                       | 1                 | Nucleolus                          | 3                 |
| Cellular copper ion homeostasis                 | 1                 | Chloroalyl aldehyde dehydrogenase        | 2                 | Nucleosome                         | 1                 |
| Cellular iron homeostasis                       | 1                 | Chlorophyll binding                      | 1                 | Nucleus                            | 15                |
| Cellular metabolic process                      | 1                 | Chromatin dna binding                    | 1                 | Peroxisome                         | 1                 |
| Cellular respiration                            | 1                 | Cobalt ion binding                       | 1                 | Plasma membrane                    | 2                 |
| Cellular response to cold                       | 2                 | Conjugate hydrolase activity             | 1                 | Plastid large ribosomal unit       | 1                 |
| Cellular response to ethylene stimulus          | 1                 | Copper chaperone activity                | 4                 | SCAR complex                       | 1                 |
| Cellular response to fatty acid                 | 1                 | Copper ion binding                       | 9                 | Vacuole                            | 3                 |
| Cellular response to nitrogen starvation        | 1                 | Cyclic nucleotide binding                | 2                 |                                    |                   |
| Cellular response to phosphate starvation       | 1                 | Cyclin-dependent protein kinase reg.     | 1                 |                                    |                   |
| Cellular response to selenium ion               | 3                 | Cystathionine beta-lyase activity        | 1                 |                                    |                   |
| Cellular response to water deprivation          | 2                 | Cysteine synthase activity               | 1                 |                                    |                   |
| Chlorophyll biosynthetic process                | 2                 | Cysteine-type endopeptidase activity     | 2                 |                                    |                   |
| Chloroplast thylakoid membrane                  | 1                 | Cytochrome-b5 reductase activity         | 2                 |                                    |                   |
| Cinnamic acid biosynthetic process              | 3                 | Diacylglycerol kinase activity           | 1                 |                                    |                   |
| Copper ion transport                            | 1                 | Dihydrolate reductase activity           | 1                 |                                    |                   |
| Cytokinesis                                     | 1                 | Dna binding                              | 15                |                                    |                   |
| De-etiolation                                   | 1                 | Dna photolyase activity                  | 1                 |                                    |                   |
| Defense response                                | 3                 | Dna-directed rna polymerase activity     | 2                 |                                    |                   |
| Defense response to bacterium                   | 4                 | Double-stranded rna binding              | 4                 |                                    |                   |
| Development process                             | 2                 | Electron carrier activity                | 5                 |                                    |                   |
| DNA duplex unwinding                            | 1                 | Endopeptidase inhibitor activity         | 1                 |                                    |                   |
| DNA mediated transformation                     | 1                 | Enzyme inhibitor activity                | 1                 |                                    |                   |
| DNA repair                                      | 1                 | Epoxide hydrolase activity               | 1                 |                                    |                   |
| Double-strand break repair                      | 1                 | Fatty-acyl-coa binding                   | 1                 |                                    |                   |
| Embryo development in seed dormancy             | 14                | Fatty-acyl-coa reductase activity        | 1                 |                                    |                   |
| Endocytic recycling                             | 1                 | Fk506 binding                            | 1                 |                                    |                   |
| Entrainment of circadian clock                  | 1                 | Flavin adenine dinucleotide binding      | 1                 |                                    |                   |
| Ethylene biosynthetic process                   | 1                 | Glutamate synthase(nadh) activity        | 2                 |                                    |                   |
| Extracellular transport                         | 1                 | Glutathione transferase activity         | 1                 |                                    |                   |
| Fatty acid beta-oxidation                       | 1                 | Glycerol-3-phosphate o-acyltransferase   | 1                 |                                    |                   |
| Fatty acid biosynthetic process                 | 4                 | Gtp binding                              | 8                 |                                    |                   |
| Fatty acid metabolic process                    | 1                 | Heme binding                             | 6                 |                                    |                   |
| Fatty acid catabolic process                    | 1                 | Histidine-trna ligase activity           | 1                 |                                    |                   |

|                                                        |    |                                            |    |
|--------------------------------------------------------|----|--------------------------------------------|----|
| Flavonoid biosynthetic process                         | 5  | Hydrogen ion transporting atp synthase     | 4  |
| Gene silencing                                         | 2  | Hydrolase activity                         | 1  |
| Glycolipid transport                                   | 1  | Inorganic anion transporter activity       | 1  |
| Heat acclimation                                       | 1  | Intracellular cyclic nucleotide activated  | 1  |
| Heme biosynthetic process                              | 1  | Inositol monophosphatase activity          | 1  |
| Histidine biosynthetic process                         | 1  | Isopentenyl-diphosphate delta-isomerase    | 1  |
| Histone deacetylation                                  | 1  | Kinase activity                            | 4  |
| Histone H2B ubiquitination                             | 1  | Lipase activity                            | 1  |
| Hyperosmotic salinity response                         | 5  | Lipid binding                              | 5  |
| Intracellular Protein Transport                        | 1  | Lipoxygenase activity                      | 1  |
| Iron-sulfur cluster assembly                           | 1  | L-malate dehydrogenase activity            | 1  |
| Lateral root development                               | 1  | Long-chain fatty acid-coa ligase activity  | 1  |
| Lignin biosynthetic process                            | 3  | L-tyrosine:2-oxoglutarate amino-transf.    | 1  |
| Lipid storage                                          | 4  | Manganese ion binding                      | 6  |
| Lipid transport                                        | 5  | Map kinase activity                        | 1  |
| L-methionine salvage from methylthioadenosine          | 2  | Metal ion binding                          | 5  |
| L-phenylalanine biosynthetic process                   | 2  | Metalloendopeptidase activity              | 1  |
| Malate metabolic process                               | 1  | Mitochondrial respiratory chain complex    | 2  |
| Male gamete generation                                 | 2  | Mrna binding                               | 1  |
| Male meiosis                                           | 2  | Nucleic acid binding                       | 4  |
| Metabolic process                                      | 4  | Nucleocytoplasmic transporter activity     | 1  |
| Methionine biosynthetic process                        | 2  | Nucleotide binding                         | 1  |
| Microgametogenesis                                     | 1  | Nucleotide-sugar transmembrane transp.     | 1  |
| Mrna transcription                                     | 1  | Oxidoreductase activity                    | 6  |
| Multicellular organismal development                   | 3  | Pantothenate kinase activity               | 1  |
| Negative regulation of flower development              | 1  | Peptidyl-prolyl cis trans isomerase        | 1  |
| Negative regulation of transcription,DNA-dependent     | 1  | Phenylalanine ammonia-lyase activity       | 1  |
| Negative regulation of plant-type hypersensitive resp. | 1  | Phosphatidylinositol-4,5-biophosphate bi   | 2  |
| Nitrate assimilation                                   | 1  | Phosphoglycerate dehydrogenase activity    | 1  |
| Nuclear mrna splicing,via spliceosome                  | 3  | Phosphoric diester hydrolase activity      | 1  |
| Nucleosome assembly                                    | 3  | Polygalacturonase activity                 | 1  |
| Nuclear-transcribed mrna poly(A) tail shortening       | 1  | Polynucleotide 5'-hydroxyl-kinase          | 1  |
| Nucleocytoplasmic transport                            | 1  | P-p-bond-hydrolysis-driven protein         | 1  |
| Organ growth                                           | 1  | Polygalacturonate 4-alpha-galacturosyl-tr  | 1  |
| Oxidation-reduction process                            | 14 | Potassium ion transmembrane                | 1  |
| Pentose-phosphate shunt                                | 1  | Proline dehydrogenase activity             | 1  |
| Peptidyl-proline modification                          | 1  | Protein binding                            | 33 |
| Phenylalanine biosynthetic process                     | 1  | Protein disulfide oxidoreductase activity  | 3  |
| Phosphatidyl Glycerol biosynthetic process             | 1  | Protein disulfide isomerase activity       | 1  |
| Phosphatidylcholine biosynthetic process               | 3  | Protein homodimerization activity          | 1  |
| Photosynthesis                                         | 9  | Protein transporter activity               | 2  |
| Photosystem II stabilization                           | 2  | Protein serine/threonine phosphatase       | 1  |
| Pollen tube growth                                     | 1  | Purine base transmembrane transporter      | 2  |
| Pollen development                                     | 1  | Rrna-binding                               | 7  |
| Protein folding                                        | 15 | Sequence specific dna binding              | 21 |
| Protein O- linked glycosylation                        | 1  | Serine o-acetyltransferase activity        | 1  |
| Protein phosphorylation                                | 5  | Serine racemase activity                   | 1  |
| Protein targeting to vacuole                           | 1  | Serine-type endopeptidase inhibitor        | 2  |
| Protein transport                                      | 1  | Sequence-specific signalling pathway       | 1  |
| Protein ubiquitination involved in ubiquitin-dependent | 1  | Signal transducer activity                 | 2  |
| Proteolysis                                            | 3  | Small conjugating proten ligase activity   | 2  |
| Proton transport                                       | 2  | Snorna binding                             | 1  |
| Regulation of transcription,DNA-dependent              | 2  | Steroid binding                            | 1  |
| Regulation of cell cycle                               | 1  | Strictosidine synthase activity            | 1  |
| Regulation of programmed cell death                    | 1  | Structural constitute of ribosome          | 35 |
| Respiratory electron transport chain                   | 1  | Succinate dehydrogenase (ubiquinone)       | 1  |
| Response to auxin stimulus                             | 1  | Sugar-hydrogen symporter activity          | 1  |
| Response to cadmium ion                                | 4  | Transferase activity                       | 3  |
| Response to gibberellin stimulus                       | 1  | Translation initiation factor activity     | 1  |
| Response to high light intensity                       | 1  | Transmembrane transporter activity         | 2  |
| Response to hypoxia                                    | 1  | Triglyceride lipase activity               | 1  |
| Response to karrikin                                   | 4  | Triose-phosphate isomerase activity        | 1  |
| Response to metal ion                                  | 9  | Ubiquinol-cytochrome-c reductase           | 1  |
| Response to nematode                                   | 2  | Ubiquitin binding                          | 1  |
| Response to other organism                             | 2  | Ubiquitin protein ligase activity          | 1  |
| Response to salicylic acid stimulus                    | 1  | Uracil phosphoribosyltransferase activity  | 1  |
| Response to salt stress                                | 1  | Vacuole                                    | 1  |
| Response to stress                                     | 1  | Water channel activity                     | 1  |
| Response to water deprivation                          | 4  | Zinc ion binding                           | 6  |
| Ribosome biogenesis                                    | 32 | 1,3-beta-d-glucan synthase activity        | 1  |
| RNA metabolic process                                  | 1  | 1-acylglycerol-3-phosphate o-acyltrn       | 1  |
| Starch biosynthetic process                            | 1  | 9-cis-epoxycarotenoid dioxygenase activity | 1  |
| Sterol biosynthetic process                            | 1  | Inorganic anion transporter activity       | 1  |
| Transcription,DNA dependent                            | 1  | Intracellular cyclic nucleotide activated  | 1  |
| Translation                                            | 25 | Inositol monophosphatase activity          | 1  |
| Transmembrane transport                                | 2  | Isopentenyl-diphosphate delta-isomerase    | 1  |
| Transport                                              | 3  | Kinase activity                            | 4  |
| Ubiquitin-dependent protein catabolic process          | 3  | Lipase activity                            | 1  |
| Vesicle-mediated transport                             | 1  | Lipid binding                              | 5  |
| 10-formyltetrahydrflormate biosynthetic process        | 1  | Lipoxygenase activity                      | 1  |

**Table 3:** Gene ontology based functional annotation and classification of Singlet-SSRs of *Humulus Lupulus*

| Gene ontology(Biological process)             | SSR-ESTs (numbers) | Gene ontology(Molecular function)          | SSR-ESTs (numbers) | Gene ontology (Cellular component)        | SSR-ESTs (numbers) |
|-----------------------------------------------|--------------------|--------------------------------------------|--------------------|-------------------------------------------|--------------------|
| Abscisic acid mediated signalling pathway     | 3                  | Acetate-coa ligase activity                | 1                  | Anchored to membrane                      | 4                  |
| Acetate metabolic process                     | 1                  | Acetolactate synthase activity             | 1                  | Apoplast                                  | 14                 |
| Actin cytoskeleton organization               | 3                  | Acid phosphatase activity                  | 1                  | Axon                                      | 1                  |
| Activation of protein kinase C                | 1                  | Acyl carrier activity                      | 2                  | CCAAT-binding factor complex              | 1                  |
| Aerenchyma formation                          | 1                  | Acyl-coa dehydrogenase activity            | 1                  | Cell surface                              | 1                  |
| Aerobic respiration                           | 1                  | Adenylylsulfate kinase activity            | 3                  | Cell wall                                 | 23                 |
| Aging                                         | 4                  | Alanine-glyoxylate transaminase activity   | 1                  | Cellular bud neck                         | 1                  |
| Aluminium ion transport                       | 2                  | Alcohol dehydrogenase(nad) activity        | 1                  | Chloroplast                               | 78                 |
| Amino acid catabolic process                  | 1                  | Allene-oxide cyclase activity              | 1                  | Chloroplast photosystem II                | 6                  |
| Amino acid import                             | 1                  | Alpha-amylase activity                     | 2                  | Chloroplast stroma                        | 1                  |
| Amino acid transport                          | 1                  | Alpha-galactosidase activity               | 1                  | Chloroplast stromal thylakoid             | 1                  |
| Ammonia assimilation cycle                    | 2                  | Amino acid transmembrane transporter       | 3                  | Chloroplast thylakoid lumen               | 2                  |
| Anther dehiscence                             | 2                  | Amino acid binding                         | 2                  | Chromosome                                | 1                  |
| Anti-apoptosis                                | 1                  | Ammonia-lyase activity                     | 1                  | Clathrin vesicle coat                     | 1                  |
| Asparagine biosynthetic process               | 1                  | Anchored to membrane                       | 1                  | CULA RING ubiquitin ligase complex        | 2                  |
| ATP synthesis coupled proton                  | 4                  | Antioxidant activity                       | 1                  | Cytoplasm                                 | 21                 |
| Auxin mediated signaling pathway              | 3                  | Asparagine synthase                        | 1                  | Cytosol                                   | 38                 |
| Auxin polar transport                         | 2                  | Atp binding                                | 28                 | Cytosolic large ribosomal subunit         | 6                  |
| Biosynthetic process                          | 4                  | Atpase activity                            | 9                  | Cytosolic small ribosomal subunit         | 5                  |
| Branched chain family amino acid biosynthetic | 1                  | Beta-amylase activity                      | 1                  | DNA-directed RNA polymerase II,core       | 1                  |
| Brassinosteroid biosynthetic process          | 5                  | Beta-galactosidase activity                | 1                  | Endosome membrane                         | 4                  |
| Brassinosteroid mediated signalling pathway   | 3                  | Binding                                    | 6                  | Extracellular space                       | 3                  |
| Cadmium ion transport                         | 1                  | Caffeate o-methyltransferase activity      | 2                  | FACT complex                              | 1                  |
| Calcium-mediated signalling                   | 5                  | Calcium channel activity                   | 1                  | Golgi membrane                            | 4                  |
| Carbohydrate metabolic process                | 1                  | Calcium ion binding                        | 5                  | Integral to membrane                      | 4                  |
| Carbohydrate biosynthetic process             | 1                  | Calmodulin binding                         | 5                  | Intracellular                             | 4                  |
| Carbohydrate metabolic process                | 7                  | Carbohydrate transmembrane transporter     | 1                  | Intracellular cyclic nucleotide activated | 1                  |
| Carbohydrate transport                        | 2                  | Carbon sulfur lyase activity               | 2                  | Membrane                                  | 11                 |
| Carbon fixation                               | 1                  | Carboxypeptidase activity                  | 1                  | Mitochondrial matrix                      | 2                  |
| Carboxylic acid metabolic process             | 1                  | Catalytic activity                         | 6                  | Mitochondrial respiratory chain comp.     | 5                  |
| Carotene catabolic process                    | 1                  | Cellulose synthase activity                | 2                  | Mitochondrion                             | 12                 |
| Cation transport                              | 1                  | Chalcone isomerase activity                | 2                  | Nuclear speck                             | 2                  |
| Cell death                                    | 1                  | Chaperone binding                          | 1                  | Nucleus                                   | 35                 |
| Cell fate specification                       | 2                  | Chitin binding                             | 1                  | Peroxisome                                | 1                  |
| Cell fate specification                       | 1                  | Chitinase activity                         | 1                  | Plant-type cell wall                      | 3                  |
| Cell redox homeostasis                        | 3                  | Chloroalyl aldehyde dehydrogenase          | 2                  | Plasma membrane                           | 21                 |
| Cell tip growth                               | 1                  | Chlorophyll binding                        | 1                  | Plasmodesma                               | 4                  |
| Cell wall modification                        | 1                  | Chromatin dna binding                      | 1                  | Plastid                                   | 1                  |
| Cell wall thickening                          | 3                  | Cobalt ion binding                         | 1                  | Serine/ threonine phosphatase complex     | 3                  |
| Cellular iron ion homeostasis                 | 7                  | Conjugate hydrolase activity               | 1                  | Ubiquitin-protein ligase activity         | 2                  |
| Cellular localization                         | 1                  | Copper chaperone activity                  | 4                  | Vacuole membrane                          | 2                  |
| Cellular metabolic process                    | 3                  | Copper ion binding                         | 9                  | 1,3-beta-D-glucan synthase complex        | 1                  |
| Cellular respiration                          | 1                  | Cyclic nucleotide binding                  | 2                  |                                           |                    |
| Cellular response to cold                     | 1                  | Cyclin-dependent protein kinase regulator  | 1                  |                                           |                    |
| Cellular response to ethylene stimulus        | 5                  | Cystathionine beta-lyase activity          | 1                  |                                           |                    |
| Cellular response to hydrogen peroxide        | 1                  | Cysteine synthase activity                 | 1                  |                                           |                    |
| Cellular response to iron ion                 | 1                  | Cysteine-type endopeptidase activity       | 2                  |                                           |                    |
| Cellular response to nitrogen starvation      | 1                  | Cytochrome-b5 reductase activity           | 2                  |                                           |                    |
| Cellular response to phosphate starvation     | 1                  | Diaclylglycerol kinase activity            | 1                  |                                           |                    |
| Cellular response to sulfate starvation       | 1                  | Dihydrolate reductase activity             | 1                  |                                           |                    |
| Chlorophyll biosynthetic process              | 1                  | Dna binding                                | 15                 |                                           |                    |
| Chloroplast organization                      | 3                  | Dna photolyase activity                    | 1                  |                                           |                    |
| Cholesterol metabolic process                 | 1                  | Dna-directed rna polymerase activity       | 2                  |                                           |                    |
| Coenzyme A biosynthetic process               | 1                  | Double-stranded rna binding                | 4                  |                                           |                    |
| Cold acclimation                              | 1                  | Electron carrier activity                  | 5                  |                                           |                    |
| Cotyledon development                         | 2                  | Endopeptidase inhibitor activity           | 1                  |                                           |                    |
| Cyanide catabolic process                     | 2                  | Enzyme inhibitor activity                  | 1                  |                                           |                    |
| Cytochrome complex assembly                   | 1                  | Epoxide hydrolase activity                 | 1                  |                                           |                    |
| Cytochrome complex assembly                   | 1                  | Fatty-acyl-coa binding                     | 1                  |                                           |                    |
| Cytokinin transport                           | 1                  | Fatty-acyl-coa reductase activity          | 1                  |                                           |                    |
| De-etiolation                                 | 1                  | Fk506 binding                              | 1                  |                                           |                    |
| Defense response                              | 2                  | Flavin adenine dinucleotide binding        | 1                  |                                           |                    |
| Defense response to bacterium                 | 8                  | Glutamate synthase(nadh) activity          | 2                  |                                           |                    |
| Defense response to fungus                    | 2                  | Glutathione transferase activity           | 1                  |                                           |                    |
| Defense response to insect                    | 1                  | Glycerol-3-phosphate o-acyltransferase     | 1                  |                                           |                    |
| DNA duplex unwinding                          | 1                  | Gtp binding                                | 8                  |                                           |                    |
| DNA repair                                    | 2                  | Heme binding                               | 6                  |                                           |                    |
| DNA replication                               | 1                  | Histidine-trna ligase activity             | 1                  |                                           |                    |
| DNA topological change                        | 1                  | Hydrogen ion transporting atp synthase     | 4                  |                                           |                    |
| Electron transport chain                      | 1                  | Hydrolase activity                         | 1                  |                                           |                    |
| Embryo development                            | 5                  | Inorganic anion transporter activity       | 1                  |                                           |                    |
| Embryo development ending in seed dormancy    | 6                  | Intracellular cyclic nucleotide activated  | 1                  |                                           |                    |
| Embryo sac development                        | 1                  | Inositol monophosphatase activity          | 1                  |                                           |                    |
| Endocytic recycling                           | 2                  | Isopentenyl-diphosphate delta-isomerase    | 1                  |                                           |                    |
| Entrainment of circadian clock                | 1                  | Kinase activity                            | 4                  |                                           |                    |
| Establishment of cell polarity                | 5                  | Lipase activity                            | 1                  |                                           |                    |
| Ethylene mediated signalling pathway          | 1                  | Lipid binding                              | 5                  |                                           |                    |
| Far-red light signalling pathway              | 1                  | Lipoxygenase activity                      | 1                  |                                           |                    |
| Fatty acid biosynthetic process               | 3                  | L-malate dehydrogenase activity            | 1                  |                                           |                    |
| Fatty acid metabolic process                  | 1                  | Long-chain fatty acid-coa ligase activity  | 1                  |                                           |                    |
| Fatty-acyl-coa biosynthetic process           | 1                  | L-tyrosine:2-oxoglutarate aminotransferase | 1                  |                                           |                    |
| Flavonoid biosynthetic process                | 5                  | Manganese ion binding                      | 6                  |                                           |                    |
| G1 phase of mitotic cell cycle                | 1                  | Map kinase activity                        | 1                  |                                           |                    |
| Growth                                        | 1                  | Metal ion binding                          | 5                  |                                           |                    |
| Heat acclimation                              | 1                  | Metalloendopeptidase activity              | 1                  |                                           |                    |
| Histidyl-trna aminoacylation                  | 1                  | Mitochondrial respiratory chain complex    | 2                  |                                           |                    |
| Hyperosmotic salinity response                | 8                  | Mrna binding                               | 1                  |                                           |                    |
| Inositol triphosphate metabolic process       | 2                  | Nucleic acid binding                       | 4                  |                                           |                    |
| Intracellular protein transport               | 2                  | Nucleocytoplasmic transporter activity     | 1                  |                                           |                    |

|                                                     |    |                                              |    |
|-----------------------------------------------------|----|----------------------------------------------|----|
| Ion transport                                       | 1  | Nucleotide binding                           | 1  |
| Jasmonic acid biosynthetic process                  | 2  | Nucleotide-sugar transmembrane               | 1  |
| Lewis a epitope biosynthetic process                | 1  | Oxidoreductase activity                      | 6  |
| Lignin biosynthetic process                         | 3  | Pantothenate kinase activity                 | 1  |
| Lipid metabolic process                             | 2  | Peptidyl-prolyl cis trans isomerase activity | 1  |
| Lipid storage                                       | 3  | Phenylalanine ammonia-lyase activity         | 1  |
| Lipid transport                                     | 2  | Phosphatidylinositol-4,5-biophosphate        | 2  |
| L-methionine biosynthetic process                   | 1  | Phosphoglycerate dehydrogenase activity      | 1  |
| L-serine biosynthetic process                       | 1  | Phosphoric diester hydrolase activity        | 1  |
| Male gamete generation                              | 3  | Polygalacturonase activity                   | 1  |
| Meiotic chromosome segregation                      | 1  | Polynucleotide 5'-hydroxyl-kinase activity   | 1  |
| Metabolic process                                   | 6  | P-p-bond-hydrolysis-driven protein           | 1  |
| Mrna modification                                   | 1  | Polygalacturonate 4-alpha- related           | 1  |
| Multicellular organismal development                | 5  | Potassium ion transmembrane transporter      | 1  |
| Negative regulation of abscisic acid mediated       | 1  | Proline dehydrogenase activity               | 1  |
| Negative regulation of transcription,DNA            | 1  | Protein binding                              | 33 |
| Nuclear mrna splicing,via spliceosome               | 3  | Protein disulfide oxidoreductase activity    | 3  |
| Nucleocytoplasmic transport                         | 2  | Protein disulfide isomerase activity         | 1  |
| Nucleotide-excision repair                          | 1  | Protein homodimerization activity            | 1  |
| Oxidation-reduction process                         | 9  | Protein transporter activity                 | 2  |
| Peptidyl-histidine phosphorylation                  | 1  | Protein serine/ threonine phosphatase        | 1  |
| Peptidyl-proline modification                       | 1  | Purine base transmembrane transporter        | 2  |
| Phosphatidylglycerol biosynthetic process           | 1  | Rrna-binding                                 | 7  |
| Photoinhibition                                     | 1  | Sequence specific dna binding                | 21 |
| Photoreactive repair                                | 1  | Serine o-acetyltransferase activity          | 1  |
| Photorespiration                                    | 1  | Serine racemase activity                     | 1  |
| Photosynthesis                                      | 11 | Serine-type endopeptidase inhibitor          | 2  |
| Plant-type cell wall loosening                      | 1  | Sequence-specific signalling pathway         | 1  |
| Plant-type hypersensitive response                  | 2  | Signal transducer activity                   | 2  |
| Pollen germination                                  | 3  | Small conjugating proten ligase activity     | 2  |
| Pollen sperm cell differentiation                   | 1  | Snorna binding                               | 1  |
| Porphyrin-containing compound metabolic process     | 1  | Steroid binding                              | 1  |
| Post-translational protein modification             | 2  | Strictosidine synthase activity              | 1  |
| Potassium ion transport                             | 3  | Structural constitute of ribosome            | 35 |
| Production of ta-sirnas involved in RNA             | 1  | Succinate dehydrogenase (ubiquinone)         | 1  |
| Protein folding                                     | 12 | Sugar:hydrogen symporter activity            | 1  |
| Protein import into chloroplast thylakoid           | 1  | Transferase activity                         | 3  |
| Protein phosphorylation                             | 14 | Translation initiation factor activity       | 1  |
| Protein targeting to mitochondrion                  | 1  | Transmembrane transporter activity           | 2  |
| Protein targeting to vacuole                        | 1  | Triglyceride lipase activity                 | 1  |
| Protein transport                                   | 1  | Triose-phosphate isomerase activity          | 1  |
| Protein ubiquitination involved in ubiquitin-       | 5  | Ubiquinol-cytochrome-c reductase             | 1  |
| Proteolysis                                         | 3  | Ubiquitin binding                            | 1  |
| Purine base transport                               | 1  | Ubiquitin protein ligase activity            | 1  |
| Regulation of abscisic acid mediated signalling     | 1  | Uracil phosphoribosyltransferase activity    | 1  |
| Regulation of cell cycle                            | 1  | Vacuole                                      | 1  |
| Regulation of double fertilization forming a zygote | 1  | Water channel activity                       | 1  |
| Regulation of transcription,DNA-dependent           | 13 | Zinc ion binding                             | 6  |
| Regulation to translation                           | 2  | 1,3-beta-d-glucan synthase activity          | 1  |
| Response to abscisic acid stimulus                  | 2  | 1-acylglycerol-3-phosphate o-                | 1  |
| Response to auxin stimulus                          | 4  | 9-cis-epoxycarotenoid dioxygenase activity   | 1  |
| Response to brassinosteroid stimulus                | 1  |                                              |    |
| Response to cadmium ion                             | 1  |                                              |    |
| Response to cold                                    | 1  |                                              |    |
| Response to endoplasmic reticulum stress            | 1  |                                              |    |
| Response to far red light                           | 1  |                                              |    |
| Response to jasmonic acid                           | 2  |                                              |    |
| Response to karrikin                                | 4  |                                              |    |
| Response to metal ion                               | 2  |                                              |    |
| Response to oxidative stress                        | 1  |                                              |    |
| Response to phosphate starvation                    | 1  |                                              |    |
| Response to salt stress                             | 3  |                                              |    |
| Response to stress                                  | 3  |                                              |    |
| Response to water deprivation                       | 1  |                                              |    |
| Response to nematode                                | 1  |                                              |    |
| Ribosome biogenesis                                 | 14 |                                              |    |
| RNA methylation                                     | 1  |                                              |    |
| RNA splicing                                        | 2  |                                              |    |
| Serine family amino acid metabolic process          | 1  |                                              |    |
| Small gtpase mediated signal transduction           | 2  |                                              |    |
| Sterol biosynthetic process                         | 1  |                                              |    |
| Sulfate assimilation                                | 1  |                                              |    |
| Transcription,DNA-dependent                         | 3  |                                              |    |
| Translation                                         | 14 |                                              |    |
| Transmembrane protein                               | 2  |                                              |    |
| Transport                                           | 1  |                                              |    |
| Tricarboxylic acid cycle                            | 2  |                                              |    |
| Trichome branching                                  | 1  |                                              |    |
| Trna splicing                                       | 1  |                                              |    |
| Ubiquitin-dependent protein catabolic process       | 1  |                                              |    |
| Vegetative to reproductive phase transition         | 1  |                                              |    |
| (1->3)-beta-D-glucan biosynthetic process           | 1  |                                              |    |
| 10-formyltetrahydrofolate biosynthetic process      | 1  |                                              |    |
